# Supplementary material for: Syntheses, structures and properties of two zinc coordination polymers based on bis(triazole) and sulfoisophthalate
Source: Royal Society of Chemistry journal article supplement (doi:10.1039/c4ra00531g), 2014-01-01
Supplement: c4ra00531g1.pdf [file c4ra00531g1.pdf]

# Supporting materials

## Syntheses, structures and properties of two zinc coordination polymers based on bis(triazole) and sulfoisophthalicate

Min Li, Yan-Fen Peng, Shan Zhao, Bao-Long Li\* and Hai-Yan Li

Key Laboratory of Organic Synthesis of Jiangsu Province, College of Chemistry, Chemical Engineering and Materials Science, Soochow University, Suzhou 215123, P. R. China. E-mail: libaolong@suda.edu.cn

Table S1 Selected bond lengths (Å) and angles (°) for **1** and **2**.

| <b>1</b>          |            |                   |            |
|-------------------|------------|-------------------|------------|
| Zn(1)-O(1)        | 1.996(3)   | Zn(1)-O(2B)       | 2.015(3)   |
| Zn(1)-O(3A)       | 1.962(3)   | Zn(1)-N(3)        | 2.133(4)   |
| Zn(1)-N(6)        | 2.123(4)   | Zn(2)-O(8)        | 2.146(3)   |
| Zn(2)-O(9)        | 2.111(3)   | Zn(2)-N(9)        | 2.113(4)   |
| O(1)-Zn(1)-O(2B)  | 133.97(14) | O(3A)-Zn(1)-O(1)  | 126.23(15) |
| O(3A)-Zn(1)-O(2B) | 99.76(14)  | O(1)-Zn(1)-N(3)   | 88.29(15)  |
| O(2B)-Zn(1)-N(3)  | 91.34(15)  | O(3A)-Zn(1)-N(3)  | 93.13(16)  |
| O(1)-Zn(1)-N(6)   | 88.66(15)  | O(2B)-Zn(1)-N(6)  | 88.92(15)  |
| O(3A)-Zn(1)-N(6)  | 90.75(16)  | N(6)-Zn(1)-N(3)   | 176.01(17) |
| O(8C)-Zn(2)-O(8)  | 180.000(1) | O(9)-Zn(2)-O(9C)  | 180.000(1) |
| N(9)-Zn(2)-N(9C)  | 180.0(3)   | O(9)-Zn(2)-O(8)   | 91.53(16)  |
| N(9)-Zn(2)-O(8)   | 91.30(15)  | O(9)-Zn(2)-N(9)   | 91.77(15)  |
| <b>2</b>          |            |                   |            |
| Zn(1)-O(8)        | 2.144(4)   | Zn(1)-O(9)        | 2.101(4)   |
| Zn(1)-N(3)        | 2.113(5)   | Zn(2)-O(1)        | 1.952(4)   |
| Zn(2)-O(2B)       | 2.033(4)   | Zn(2)-O(3C)       | 2.036(4)   |
| Zn(2)-O(4C)       | 2.342(4)   | Zn(2)-N(6)        | 2.028(5)   |
| O(8)-Zn(1)-O(8A)  | 180.0      | O(9)-Zn(1)-O(9A)  | 180.00(12) |
| N(3)-Zn(1)-N(3A)  | 180.0(3)   | O(9)-Zn(1)-O(8)   | 88.43(19)  |
| N(3)-Zn(1)-O(8)   | 89.04(18)  | O(9)-Zn(1)-N(3)   | 89.90(18)  |
| O(1)-Zn(2)-O(2B)  | 102.07(15) | O(1)-Zn(2)-O(3C)  | 139.32(17) |
| O(1)-Zn(2)-O(4C)  | 87.95(15)  | O(2B)-Zn(2)-O(3C) | 102.35(16) |
| O(2B)-Zn(2)-O(4C) | 92.25(16)  | O(3C)-Zn(2)-O(4C) | 59.09(15)  |
| O(1)-Zn(2)-N(6)   | 113.35(18) | N(6)-Zn(2)-O(2B)  | 98.95(18)  |
| N(6)-Zn(2)-O(3C)  | 94.28(18)  | N(6)-Zn(2)-O(4C)  | 152.91(17) |

Symmetry transformations used to generate equivalent atoms: A  $x-1, y, z$ ; B  $-x+2, -y+2, -z+2$ ; C  $-x+1, -y+1, -z+1$  for **1**; A  $-x+3, -y+2, -z$ ; B  $-x+1, -y, -z+1$ ; C  $x+1, y, z$  for **2**.

**Table S2** Hydrogen bonds (Å and °) for **1**.

| D-H...A                         | d(D-H)    | d(H...A) | d(D...A)  | <(DHA) |
|---------------------------------|-----------|----------|-----------|--------|
| O(8)-H(1W)...O(10)              | 0.897(19) | 1.84(2)  | 2.739(6)  | 176(5) |
| O(8)-H(2W)...O(4) <sup>i</sup>  | 0.890(19) | 1.94(2)  | 2.825(5)  | 172(5) |
| O(9)-H(3W)...O(7)               | 0.893(19) | 2.12(2)  | 2.992(7)  | 165(5) |
| O(9)-H(4W)...O(11)              | 0.891(19) | 1.87(3)  | 2.717(11) | 157(6) |
| O(10)-H(5W)...O(7)              | 0.89(2)   | 1.89(2)  | 2.751(6)  | 161(5) |
| O(10)-H(6W)...O(7) <sup>i</sup> | 0.89(2)   | 2.32(4)  | 3.107(7)  | 146(5) |

Symmetry transformations used to generate equivalent atoms: i  $-x+2, -y+1, -z+1$ .

**Table S3** Hydrogen bonds (Å and °) for **2**.

| D-H...A                          | d(D-H)    | d(H...A) | d(D...A) | <(DHA) |
|----------------------------------|-----------|----------|----------|--------|
| O(8)-H(1W)...O(6) <sup>i</sup>   | 0.890(19) | 1.86(2)  | 2.748(7) | 172(5) |
| O(8)-H(2W)...O(5) <sup>ii</sup>  | 0.885(19) | 1.89(3)  | 2.769(7) | 170(7) |
| O(9)-H(3W)...O(4) <sup>iii</sup> | 0.897(19) | 1.88(2)  | 2.776(6) | 176(6) |
| O(9)-H(4W)...O(10) <sup>i</sup>  | 0.89(2)   | 1.94(3)  | 2.782(9) | 159(6) |

Symmetry transformations used to generate equivalent atoms: i  $-x+2, -y+1, -z+1$ ; ii  $x+2, y+1, z-1$ ; iii  $-x+1, -y+1, -z+1$ .

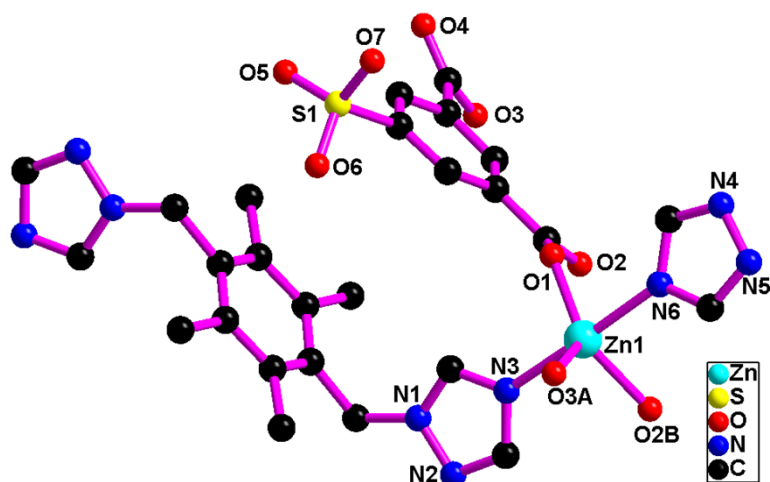

**Fig. S1** The coordination environment of the Zn(II) atom in the first motif  $[Zn_2(tmtz)_2(sip)_2]_n$  of **1**.

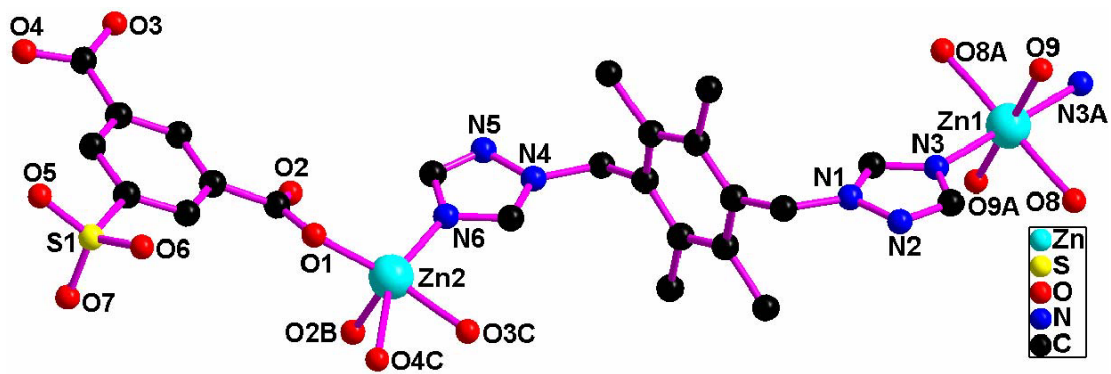

Fig. S2 The coordination environment of the Zn(II) atoms of **2**.

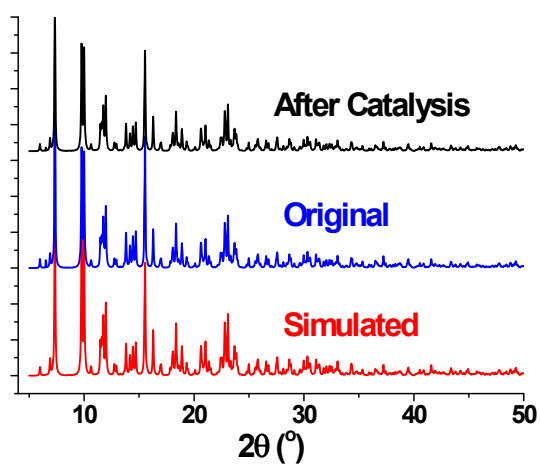

Fig. S3 PXRD patterns of the simulated diagram from single crystal data of compound **1** (red), **1** (blue) and **1** after catalysis process (black).

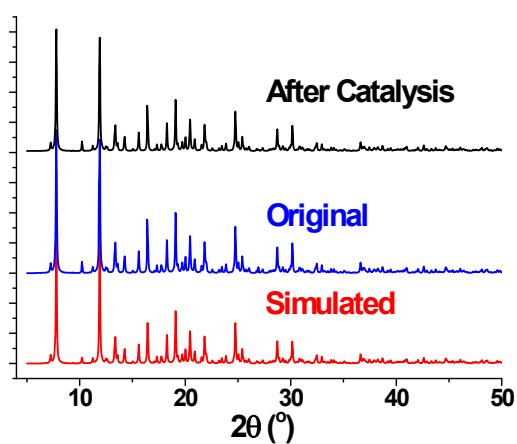

Fig. S4 PXRD patterns of the simulated diagram from single crystal data of compound **2** (red), **2** (blue) and **2** after catalysis process (black).

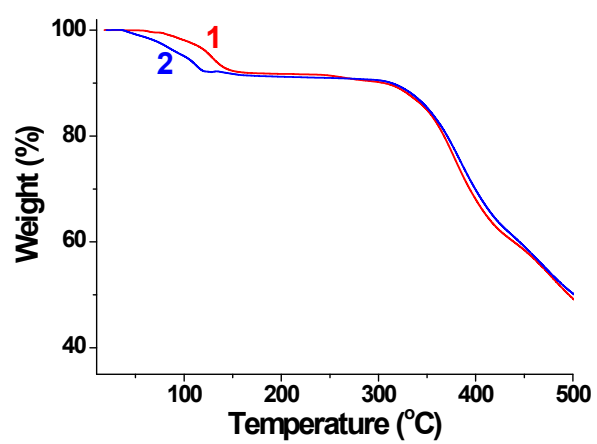

Fig. S5 The TG curves of compounds 1 and 2.
